# Supplementary material for: A sorbent containing pH-responsive chelating residues of aspartic and maleic acids for mitigation of toxic metal ions, cationic, and anionic dyes
Source: Royal Society of Chemistry journal article supplement (doi:10.1039/d1ra09234k), 2022-01-01
Supplement: d1ra09234k1.pdf [file d1ra09234k1.pdf]

## Supporting Information

### **A resin containing pH-responsive chelating residues of aspartic and maleic acids for mitigation of toxic metal ions and methylene blue**

Shaikh A. Ali\*<sup>a,b</sup>, Shuaib A. Mubarak<sup>a</sup>, Ibrahim Y. Yaagoob<sup>a</sup>, Zeeshan Arshad<sup>a</sup>, and Mohammad A. J. Mazumder\*<sup>a,b</sup>

<sup>a</sup>*Chemistry Department, King Fahd University of Petroleum & Minerals, Dhahran 31261, Saudi Arabia.*

<sup>b</sup>*Interdisciplinary Research Center for Advanced Materials, King Fahd University of Petroleum & Minerals, Dhahran 31261, Saudi Arabia*

**Table S1. Kinetics of the adsorption of Pb(II)<sup>a</sup> on CPZA 7.**

| <i>Second-order</i>            |                                                  |                                                |                                                |                                               |        |                                  |
|--------------------------------|--------------------------------------------------|------------------------------------------------|------------------------------------------------|-----------------------------------------------|--------|----------------------------------|
| Temp<br>(K)                    | $q_{e, \text{exp}}$<br>(mg g <sup>-1</sup> )     | $k_2$<br>(h <sup>-1</sup> g mg <sup>-1</sup> ) | $h^b$<br>(h <sup>-1</sup> mg g <sup>-1</sup> ) | $q_{e, \text{calc}}$<br>(mg g <sup>-1</sup> ) | $R^2$  | $E_a$<br>(kJ mol <sup>-1</sup> ) |
| 298                            | 79.49                                            | 1.812                                          | 11469                                          | 79.56                                         | 0.9999 | 40.7                             |
| 313                            | 79.72                                            | 4.184                                          | 26610                                          | 79.75                                         | 1.0000 |                                  |
| 328                            | 79.83                                            | 8.126                                          | 51814                                          | 79.85                                         | 0.9999 |                                  |
| <i>First-order</i>             |                                                  |                                                |                                                |                                               |        |                                  |
| Temp<br>(K)                    | $q_{e, \text{exp}}$<br>(mg g <sup>-1</sup> )     | $k_1$<br>(h <sup>-1</sup> )                    |                                                | $q_{e, \text{calc}}$<br>(mg g <sup>-1</sup> ) | $R^2$  |                                  |
| 298                            | 79.49                                            | 3.023                                          |                                                | 6.378                                         | 0.9928 |                                  |
| 313                            | 79.72                                            | 8.546                                          |                                                | 5.384                                         | 0.9980 |                                  |
| 328                            | 79.83                                            | 9.656                                          |                                                | 3.877                                         | 0.9654 |                                  |
| <i>Intraparticle diffusion</i> |                                                  |                                                |                                                |                                               |        |                                  |
| Temp<br>(K)                    | $k_p$<br>(mg g <sup>-1</sup> h <sup>-1/2</sup> ) | $x_i$<br>(mg g <sup>-1</sup> )                 |                                                | $R_i$                                         | $R^2$  |                                  |
| 298                            | 9.090                                            | 72.01                                          |                                                | 0.0941                                        | 0.9955 |                                  |
| 313                            | 10.41                                            | 73.54                                          |                                                | 0.0775                                        | 0.9934 |                                  |
| 328                            | 11.64                                            | 74.50                                          |                                                | 0.0668                                        | 0.9973 |                                  |

<sup>a</sup>Adsorption of Pb(II) (200 ppm, 100 mL) by CPZA 7 (250 mg) (final pH: 6.0).

<sup>b</sup>Initial adsorption rate  $h = k_2 q_e^2$ .

**Table S2.** Thermodynamic parameters for the adsorption Pb(II) by CPZA 7.

| Temperature<br>(K) | $K_L^a$<br>(L mg <sup>-1</sup> ) | $K_e^{o b}$<br>(unit less) | $\Delta G^o^c$<br>(kJ mol <sup>-1</sup> ) | $\Delta H^o$<br>(kJ mol <sup>-1</sup> ) | $\Delta S^o$<br>(J mol <sup>-1</sup> K <sup>-1</sup> ) | $R^2$  |
|--------------------|----------------------------------|----------------------------|-------------------------------------------|-----------------------------------------|--------------------------------------------------------|--------|
| 298                | 0.072                            | 14918                      | (-) 23.8                                  | (+) 27.8                                | (+)173                                                 | 0.9909 |
| 313                | 0.1246                           | 25817                      | (-) 26.4                                  |                                         |                                                        |        |
| 328                | 0.2012                           | 41689                      | (-) 29.0                                  |                                         |                                                        |        |

<sup>a</sup>From Langmuir nonlinear isotherms. <sup>b</sup>using Eq (10). <sup>c</sup> $\Delta G^o = - RT \text{Ln } K_e^o$

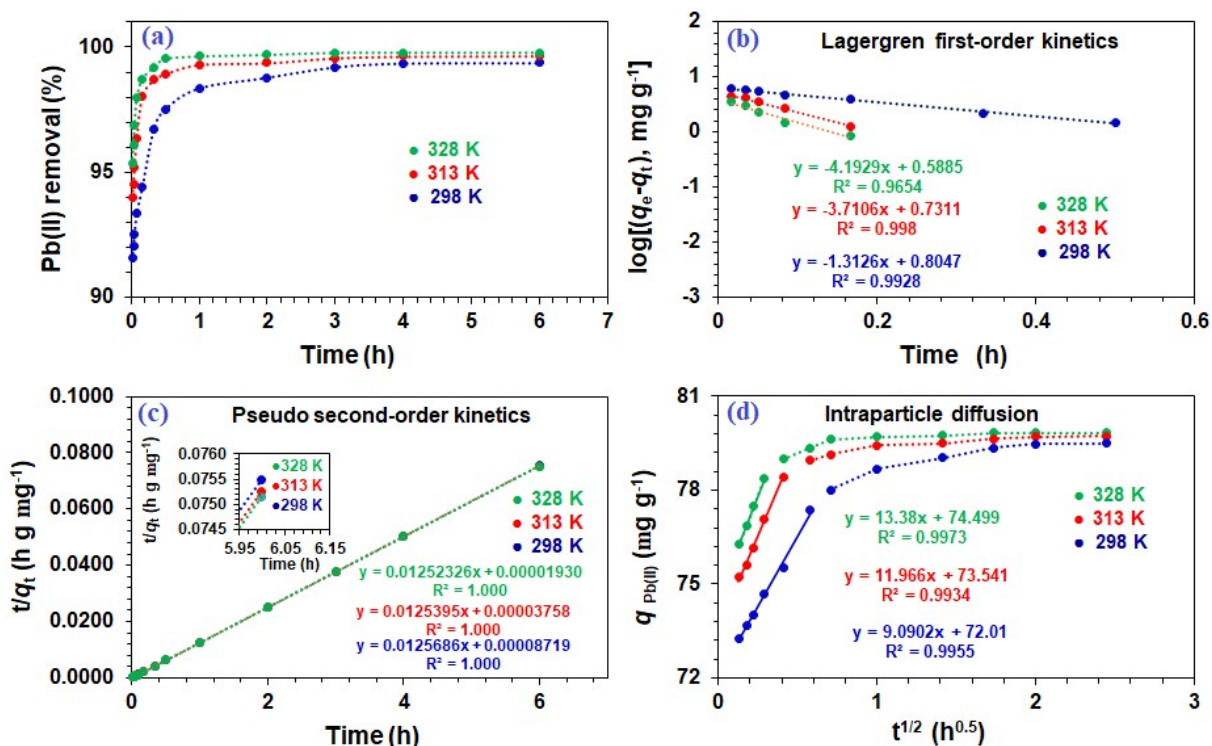

**Figure S1.** Kinetics of removal of Pb(II) by CPZA 7 at ●298, ●313, and ●328 K: Kinetic plots of (a) percent Pb(II) uptake by CPZA 7; (b) First-order, (c) Second-order, and (d) Intraparticle diffusion. [Experimental conditions: CPZA 7 (250 mg), 200 ppm MB (100 mL), pH 6.0]

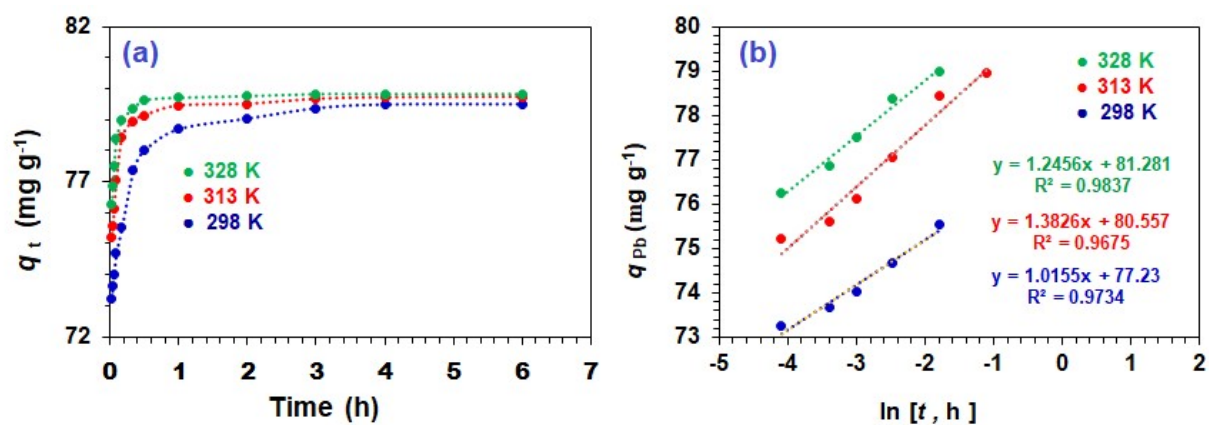

**Figure S2.** (a) Changes of adsorption capacity,  $q_t$  of Pb(II) over time; (b) Plot of Elovich kinetic model. [Experimental conditions: 250 mg CPZA 7, 100 mL 200 ppm Pb(II), pH 6.0];

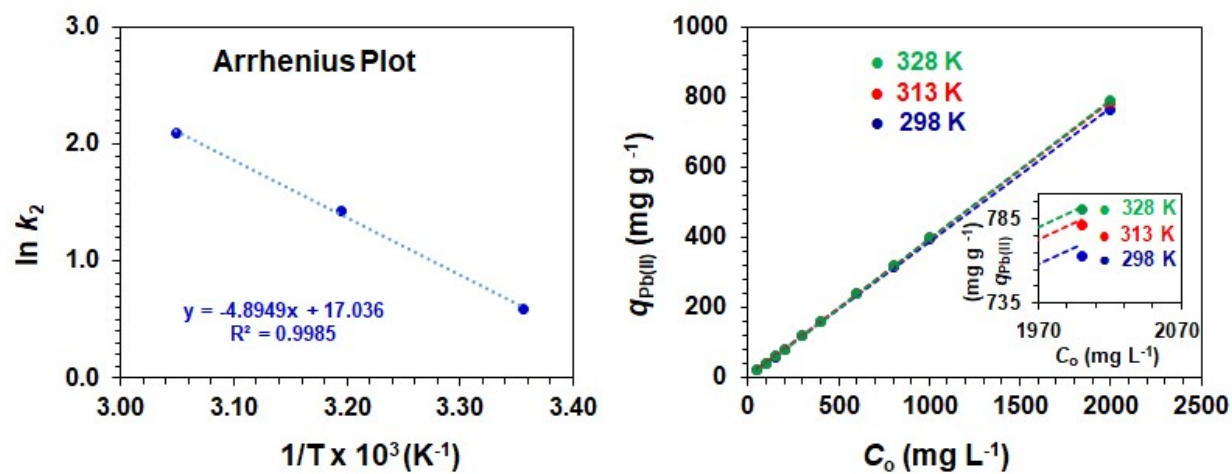

**Figure S3.** a) Arrhenius plot and (b) dependency of  $q_e$  of CPZA 7 on the initial Pb(II) concentrations ( $C_o$ ) at 298, 313, and 328 K

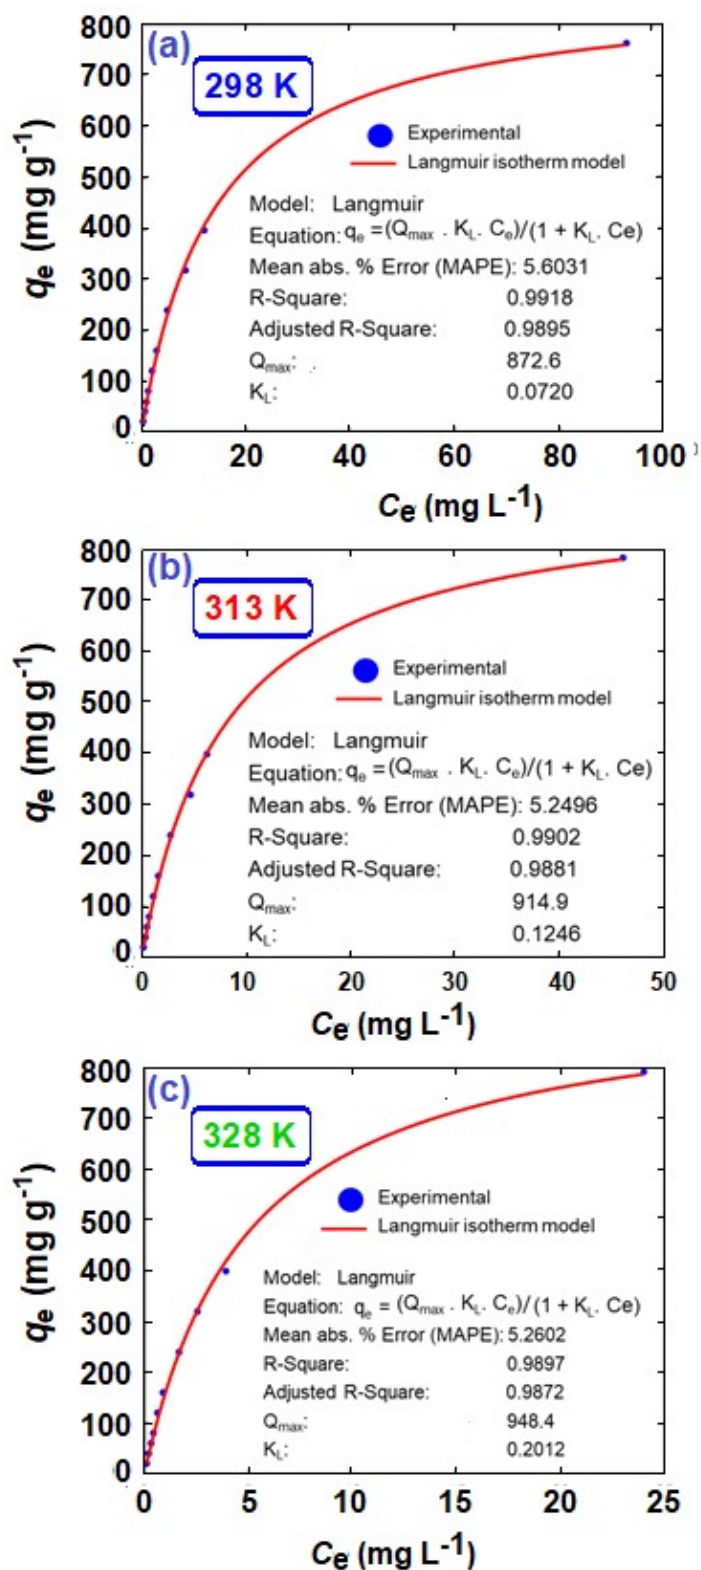

**Figure S4.** The removal of Pb(II) by CPZA 7: Nonlinear Langmuir Isotherms at (a) 298 K, (b) 313 K and (c) 328 K. [Resin (50 mg), 20 mL Pb(II) having  $C_0$  50, 100, 150, 200, 300, 400, 600, 800, 1000, and 2000 ppm, final pH: 6.0].

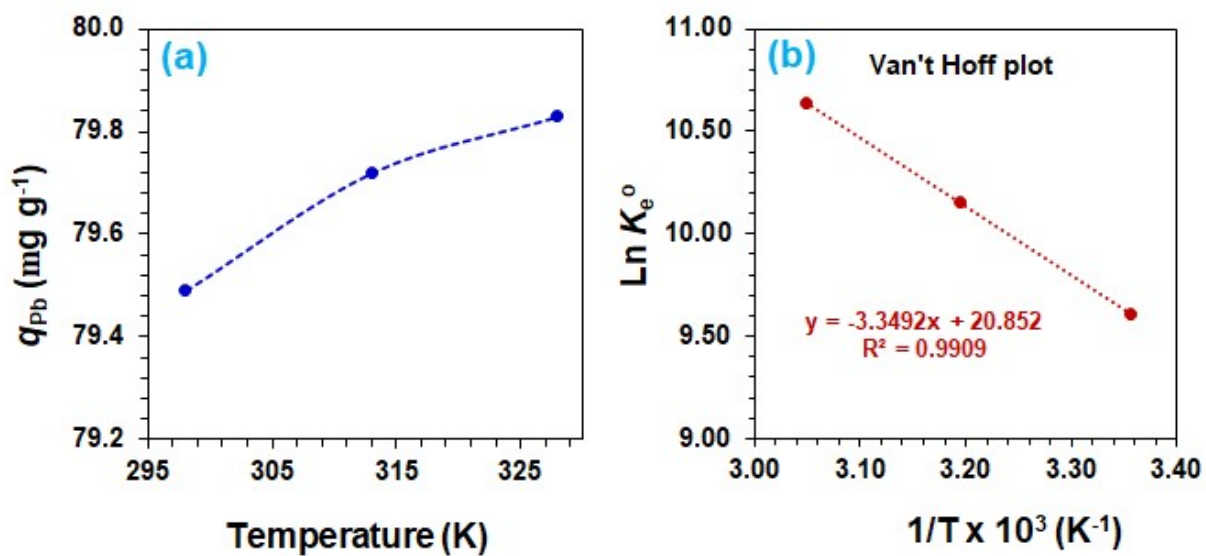

**Figure S5.** (a) Dependency of Pb(II) adsorption capacity,  $q_e$  on temperature [50 mg CPZA 7, 20 mL 200 ppm Pb(II) ( $C_o$ ), pH 6.0] and (b) Van't Hoff plot.
